# Supplementary material for: Time-Series Transcriptome of Cucumis melo Reveals Extensive Transcriptomic Differences with Different Maturity
Source: MDPI journal article supplement (doi:10.3390/genes15020149), 2024-01-24
Supplement: s1 [file s1]

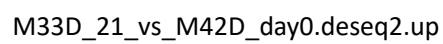



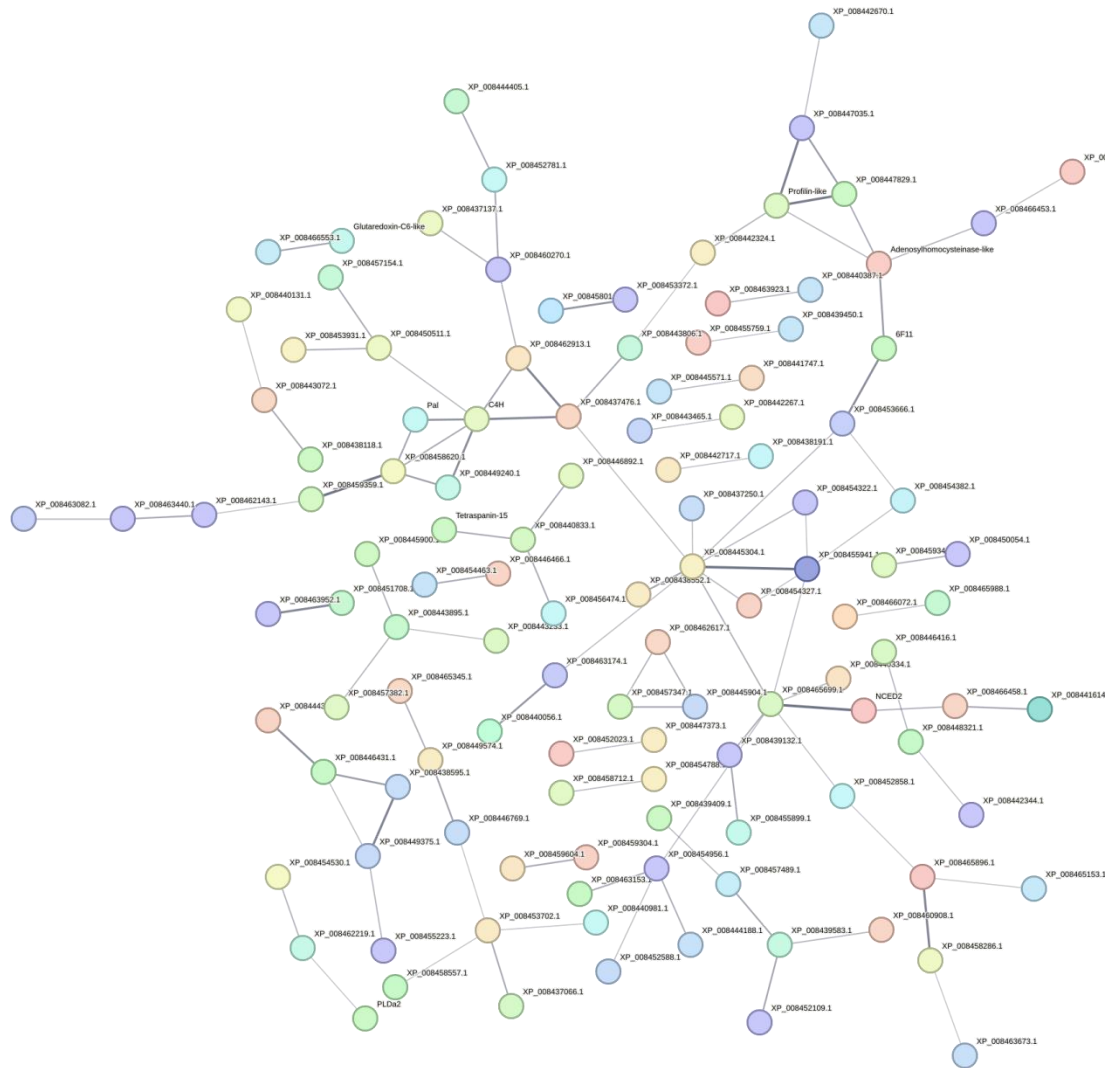

M3D\_21\_vs\_M42D\_day3.deseq2.up

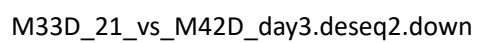

M33D\_21\_vs\_M42D\_day3.deseq2.down

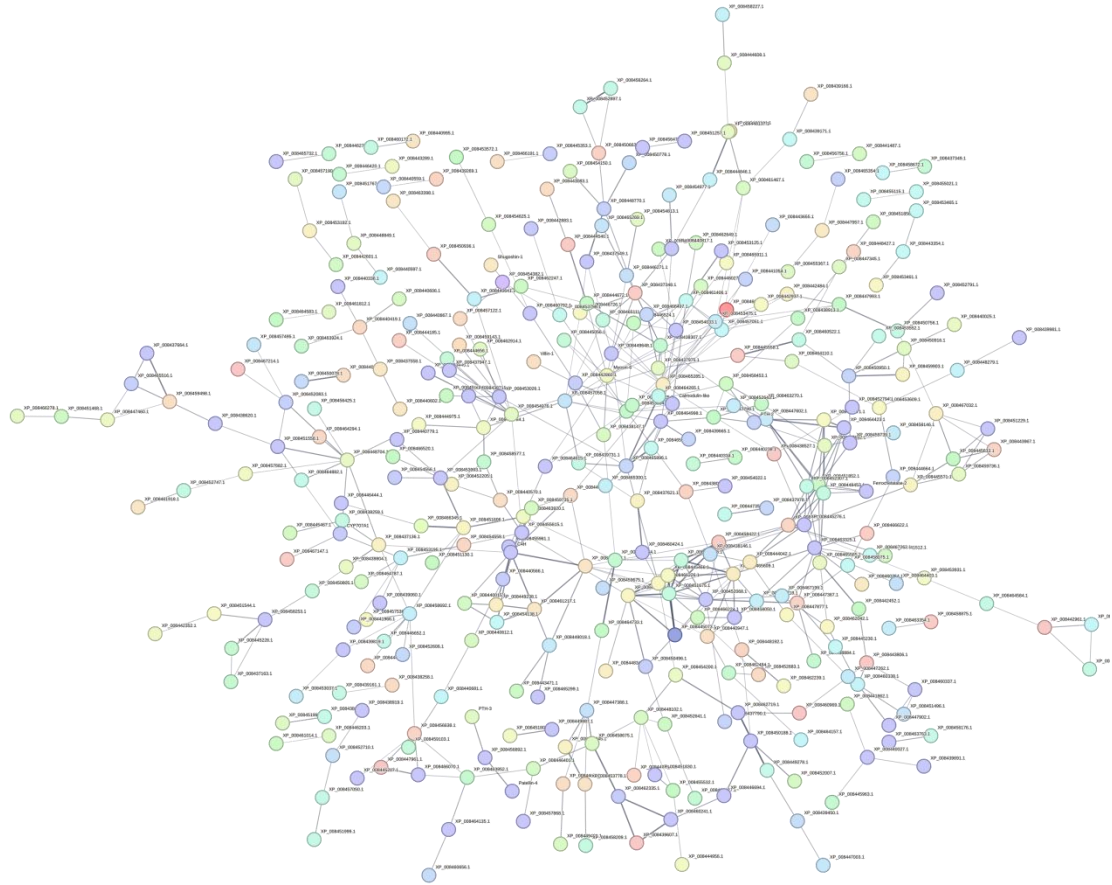

M33D\_21\_vs\_M42D\_day5.deseq2.up

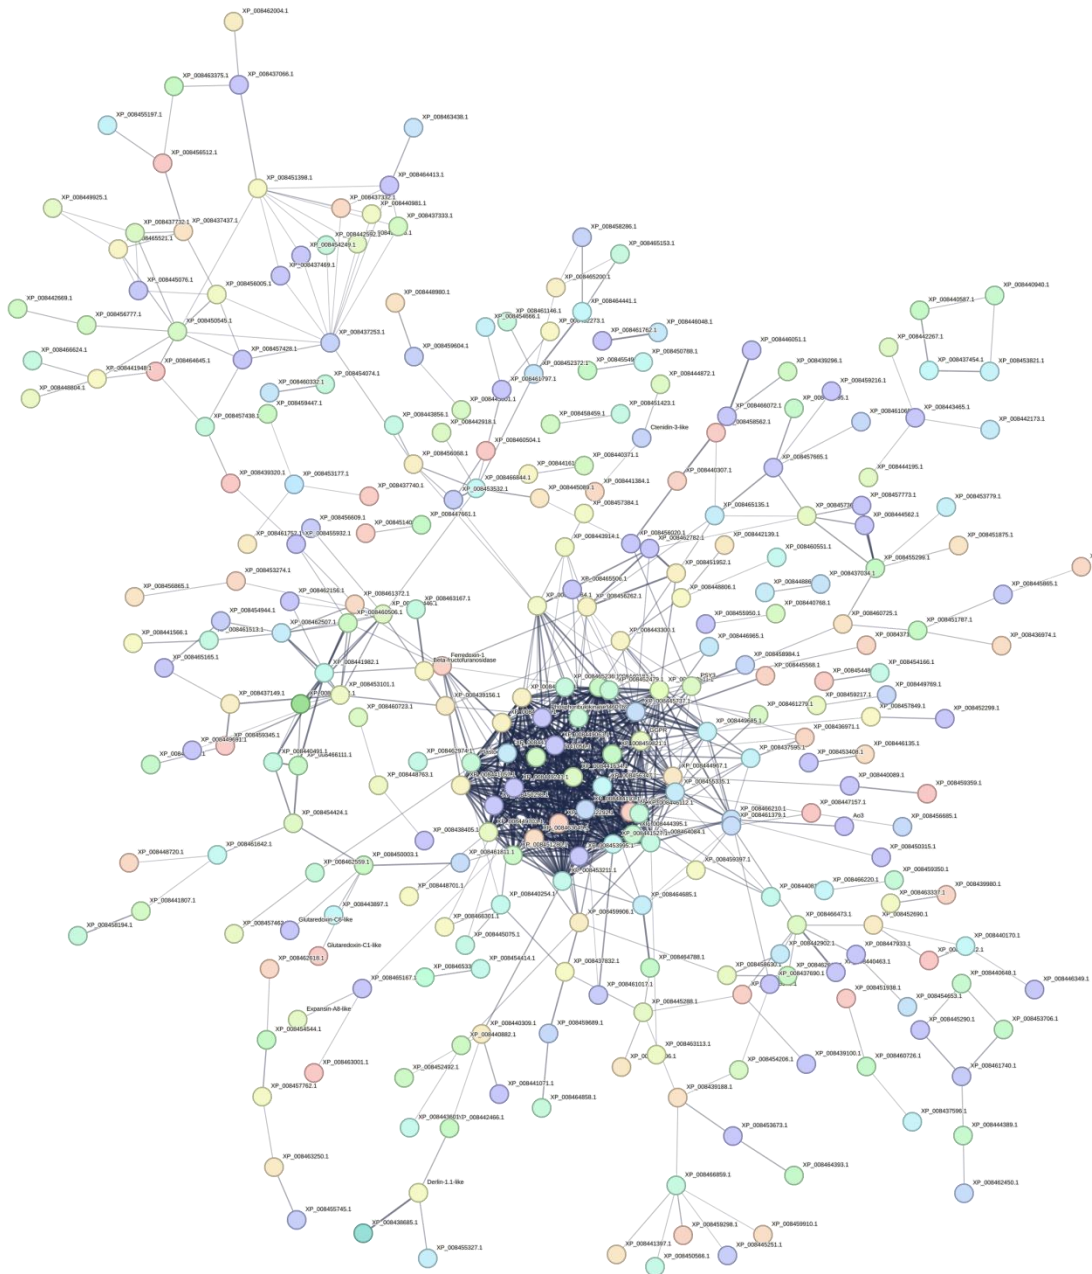

M33D\_21\_vs\_M42D\_day5.deseq2.down

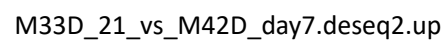

M33D\_21\_vs\_M42D\_day7.deseq2.up

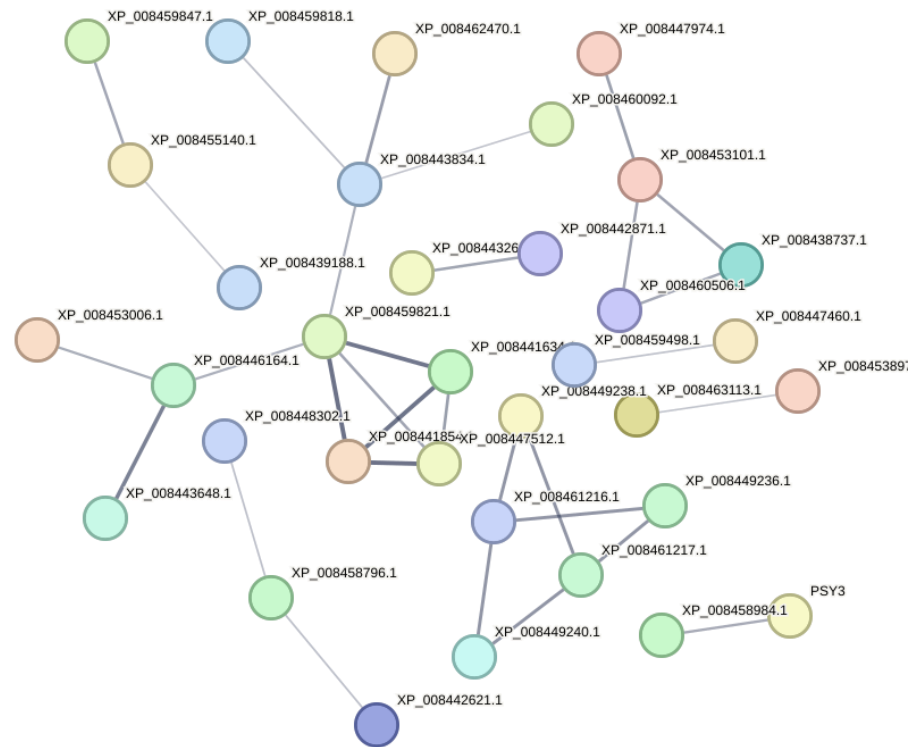

M33D\_21\_vs\_M42D\_day7.deseq2.down



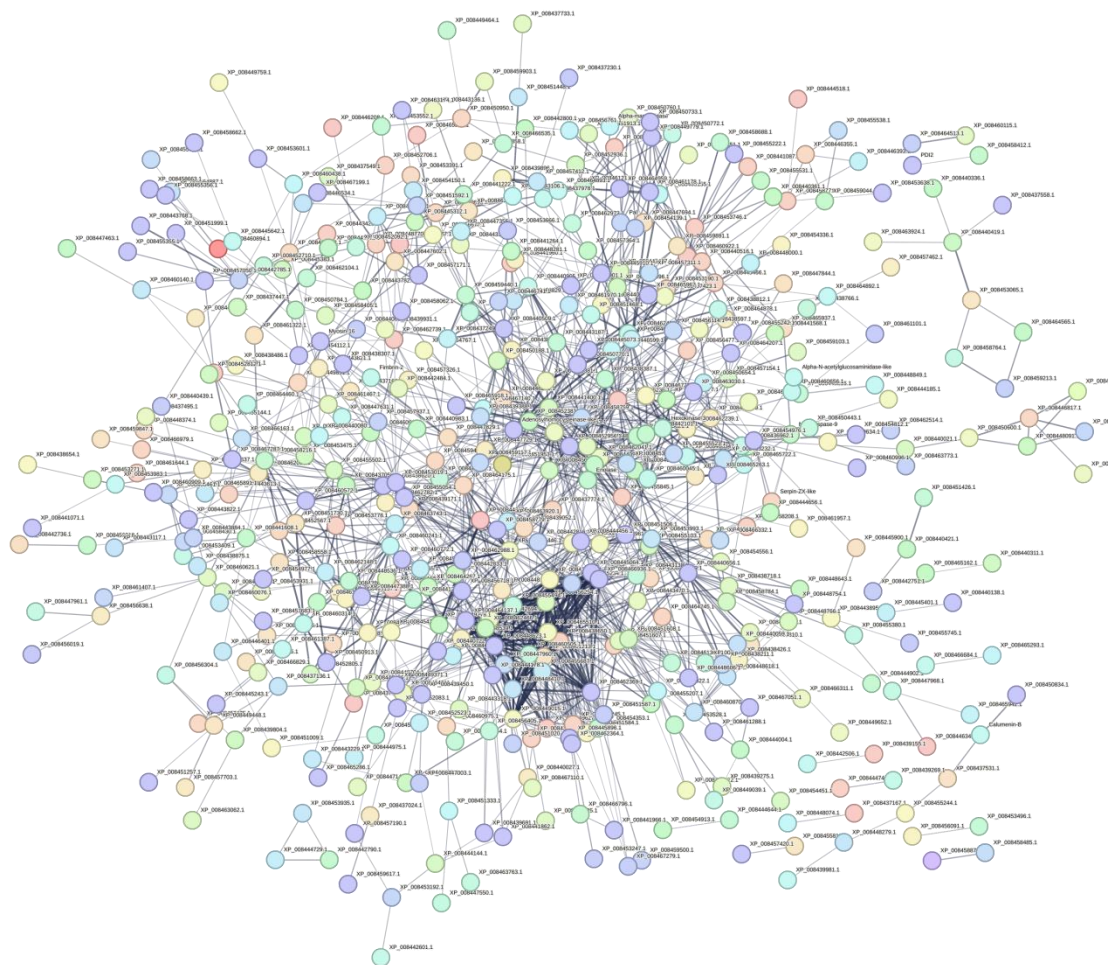

M33D\_21\_vs\_M42D\_day14.deseq2.up

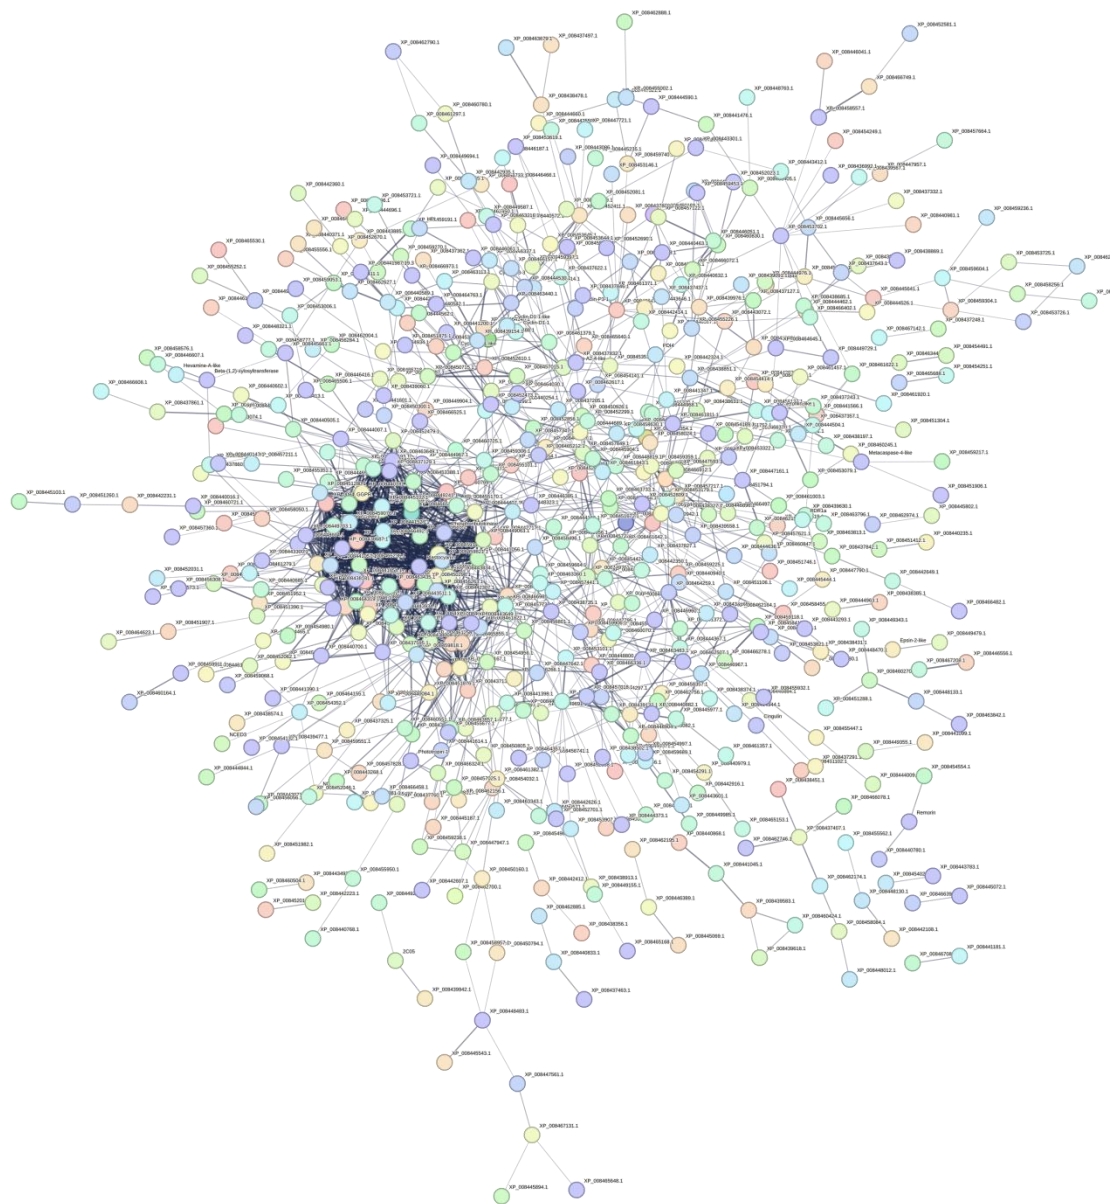

M33D\_21\_vs\_M42D\_day14.deseq2.down

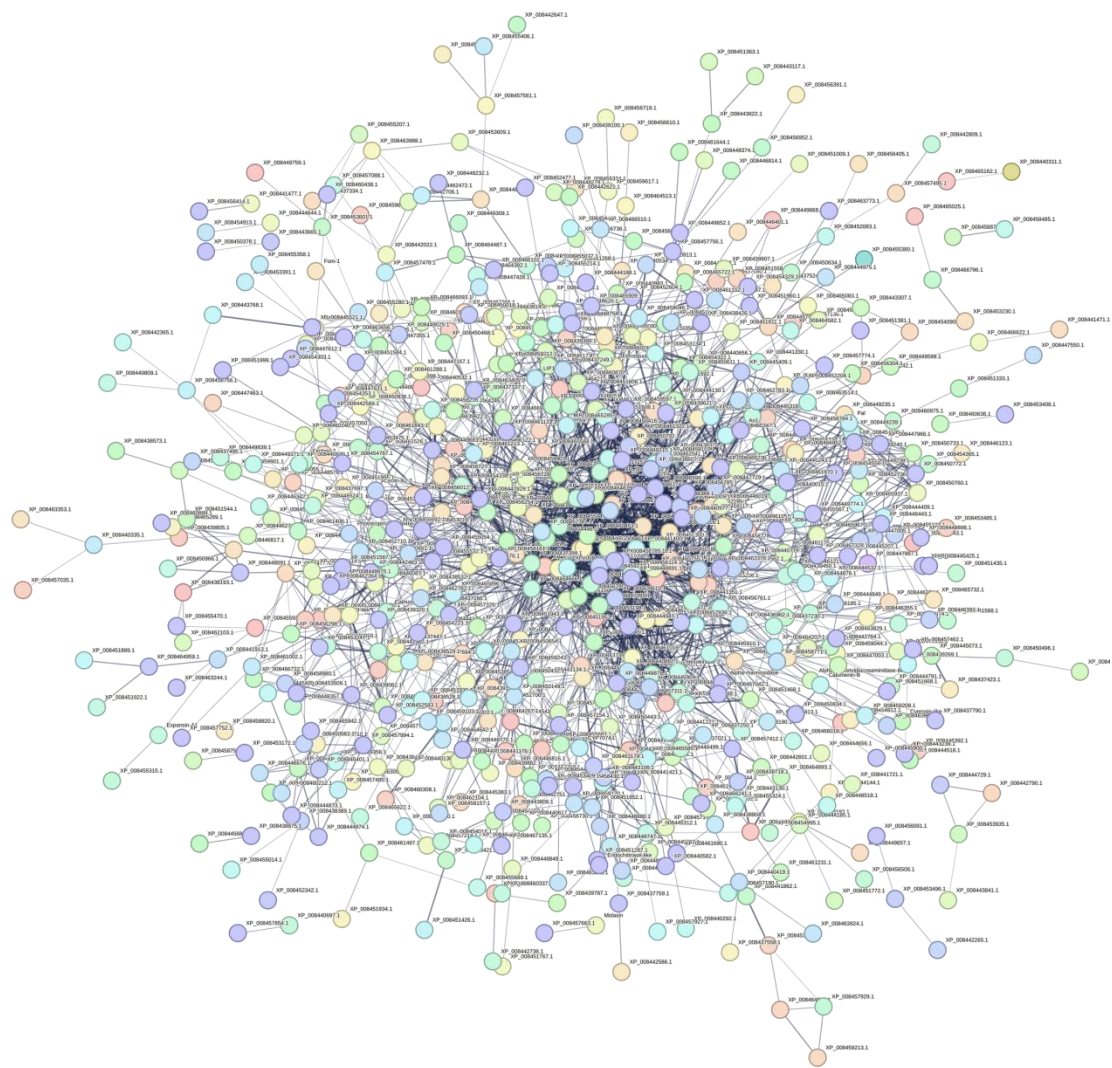

M33D\_21\_vs\_M42D\_day21.deseq2.up



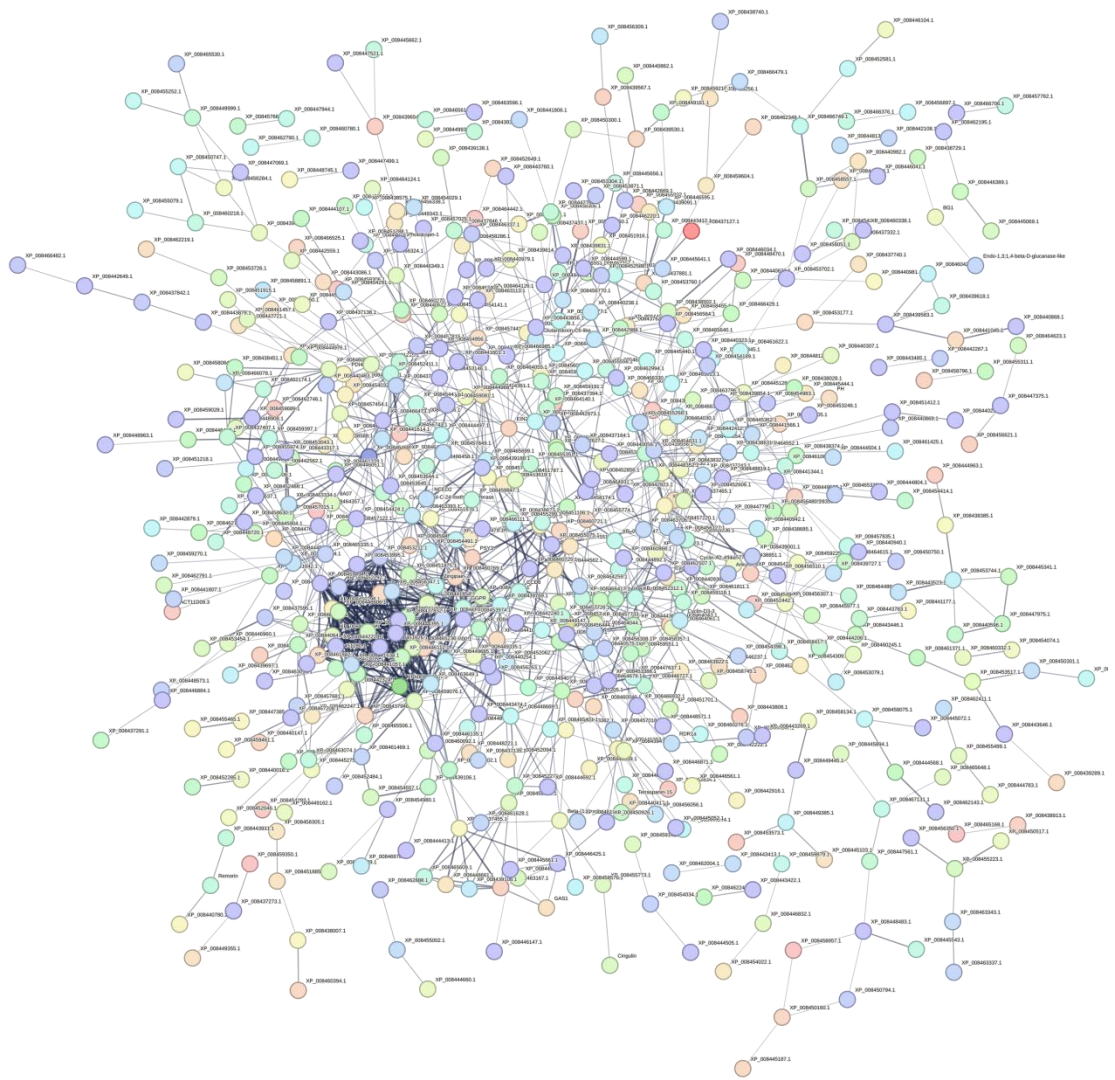

M33D\_21\_vs\_M42D\_day21.deseq2.down
